# Supplementary material for: Cell-penetrating interactomic inhibition of nuclear factor-kappa B in a mouse model of postoperative cognitive dysfunction
Source: PubMed Central journal article supplement (PMC5647420; doi:10.1038/s41598-017-14027-2), 2017-10-18
Supplement: 41598_2017_14027_MOESM1_ESM.pdf [file 41598_2017_14027_MOESM1_ESM.pdf]

**[Supplementary Information]**

**Cell-penetrating interactomic inhibition of nuclear factor-kappa B in a mouse model of  
postoperative cognitive dysfunction**

So Yeong Cheon<sup>1,2†</sup>, Jeong Min Kim<sup>1,2†</sup>, Eun Hee Kam<sup>1,2</sup>, Chun-Chang Ho<sup>3</sup>, Eun Jung Kim<sup>1,2</sup>,  
Seungsoo Chung<sup>4</sup>, Ji-Hyun Jeong<sup>4</sup>, Diane Da-Hyun Lee<sup>5,6</sup>, Sang-Won Lee<sup>5</sup>, and  
Bon-Nyeo Koo<sup>1,2\*</sup>

<sup>1</sup>Department of Anesthesiology and Pain Medicine, Yonsei University College of Medicine, Seoul, Republic of Korea

<sup>2</sup>Anesthesia and Pain Research Institute, Yonsei University College of Medicine, Seoul, Republic of Korea

<sup>3</sup>Department of Biotechnology, College of Life Science and Biotechnology, Yonsei University, Seoul, Republic of Korea

<sup>4</sup>Department of Physiology, Brain Korea 21 Plus Project for Medical Science, Yonsei University College of Medicine, Seoul, Republic of Korea

<sup>5</sup>Division of Rheumatology, Department of Internal Medicine, Yonsei University College of Medicine, Seoul, Republic of Korea

<sup>6</sup>Seoul International School, Seongnam, Republic of Korea

**\*Correspondence should be addressed to:**

Bon-Nyeo Koo, MD, PhD. Department of Anesthesiology and Pain Medicine, Yonsei University College of Medicine, 50-1, Yonsei-ro, Seodaemun-gu, Seoul 120-752, Republic of Korea, E-mail: koobn@yuhs.ac

[Supplementary data]

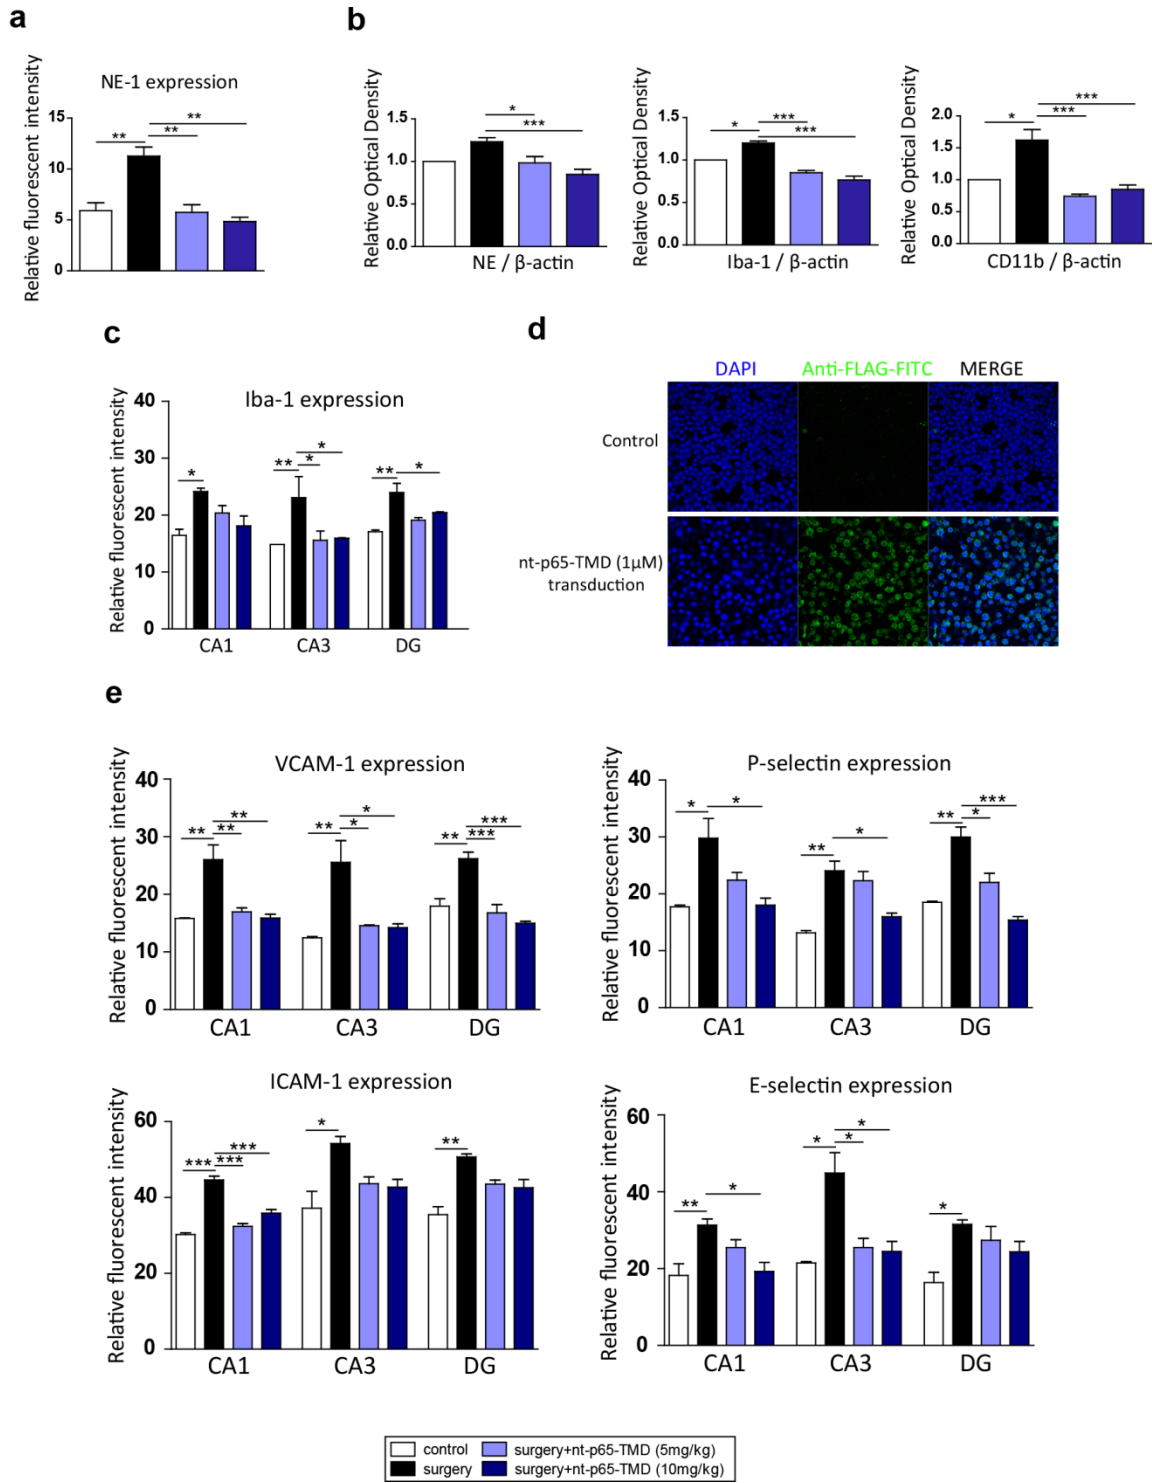

**Supplementary Figure S1.** (a) The graph shows that relative fluorescent intensity for NE-1 in the cerebral cortex at 2 days after surgery (n = 3). (b) Protein levels of NE (n = 5-11), Iba-1 (n = 4-11), and CD11b (n = 4-11) in the Hippocampus was measured by western blot analysis

at 2 days after surgery and semi-quantitative graphs shows relative optical density. Each value was normalized with  $\beta$ -actin. (c) Expression of Iba-1 in the hippocampus was calculated by immunoreactivity with Carl zeiss Zen program 2010 (n = 3-4). (d) Cell transduction of nt-p65-TMD was confirmed by immunocytochemistry for FLAG in RAW264.7 cell line. (e) VCAM-1 (n = 3-4), ICAM-1 (n = 3-4), P-selectin (n = 3-5), and E-selectin (n = 3-5) expressions in the hippocampus were measured by immunofluorescent staining at 2 days after surgery. Values are means  $\pm$  SEM. *P* values were calculated with multiple comparisons by Bonferroni tests. \**p* < 0.05, \*\**p* < 0.01, \*\*\**p* < 0.001 vs. surgery group. Statistical parameter (Supplementary Table 8).

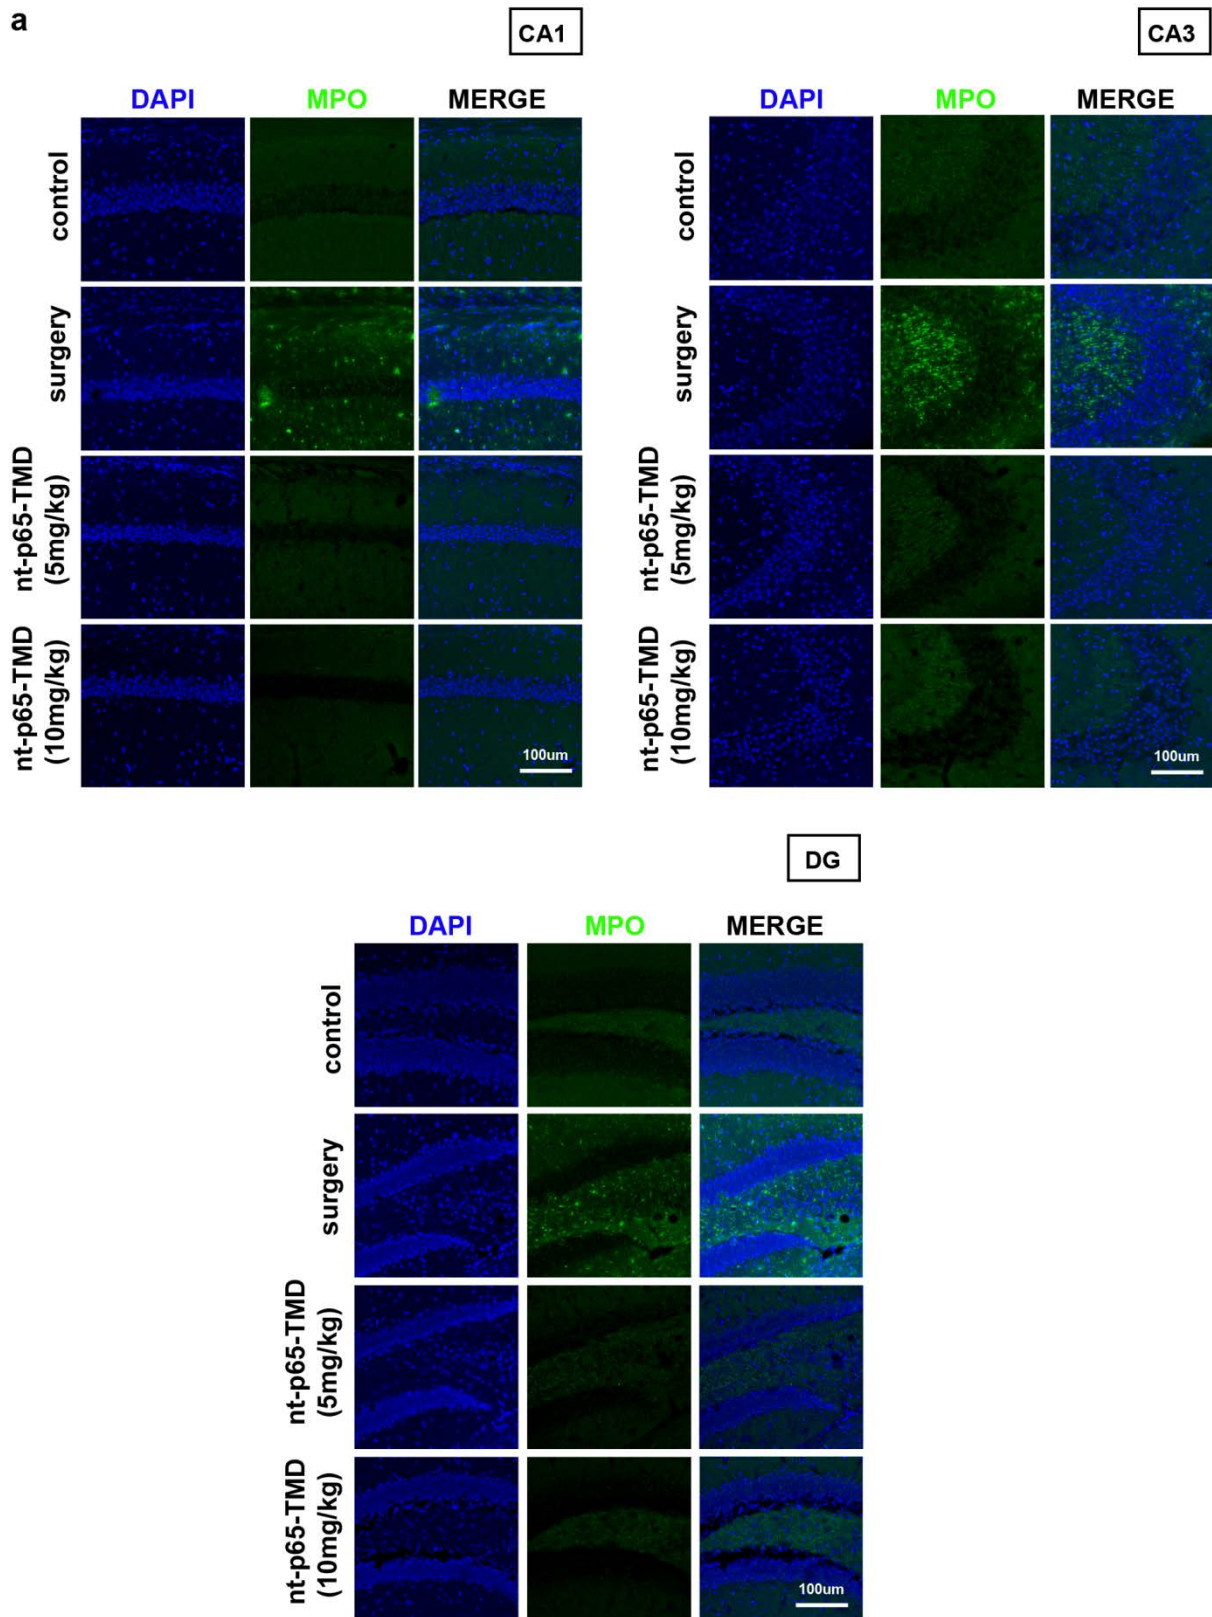

**Supplementary Figure S2.** (a) Immunofluorescent images show MPO expression in the hippocampus.

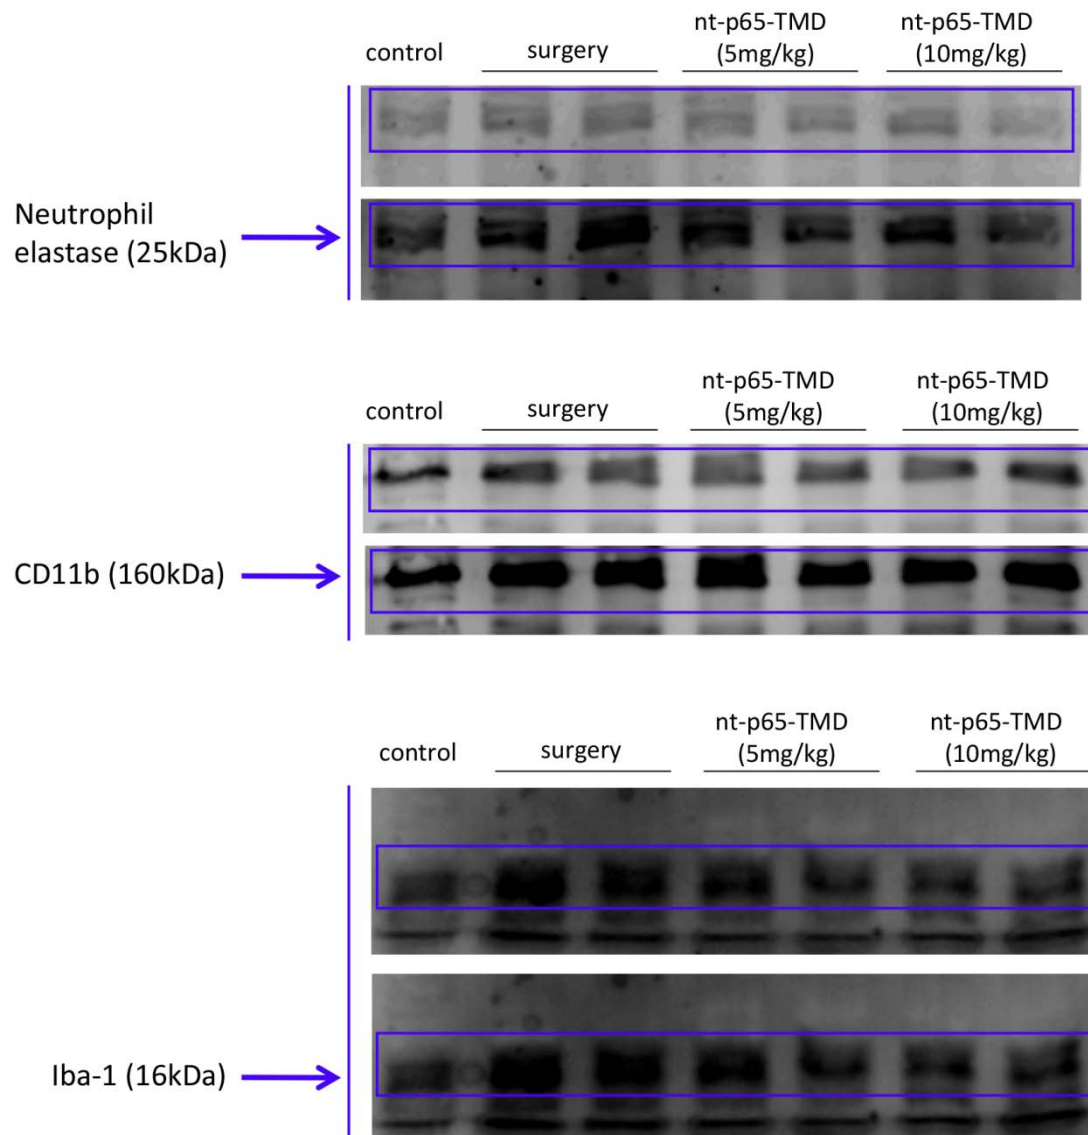

**Supplementary Figure S3.** Full size-blots of Fig. 2e

Table. 1. Sequence of primer for real-time PCR

|                   |         |                                  |
|-------------------|---------|----------------------------------|
| <i>β-actin</i>    | Forward | 5' - AGAGGGAAATCGTGCGTGAC - 3'   |
|                   | Reverse | 5' - CAATAGTGATGACCTGGCCGT - 3'  |
| <i>TNF-α</i>      | Forward | 5' - ACGGCATGGATCTCAAAGAC - 3'   |
|                   | Reverse | 5' - AGATAGCAAATCGGCTGACG - 3'   |
| <i>IL-1β</i>      | Forward | 5' - TGTCTTGGCCGAGGACTAAG - 3'   |
|                   | Reverse | 5' - TGGGCTGGACTGTTTCTAATGC - 3' |
| <i>IL-6</i>       | Forward | 5' - TCCAGTTGCCTTCTTGGGAC - 3'   |
|                   | Reverse | 5' - GTGTAATTAAGCCTCCGACTTG - 3' |
| <i>iNOS</i>       | Forward | 5' - CAGCTGGGCTGTACAAACCT - 3'   |
|                   | Reverse | 5' - CATTGGAAGTGAAGCGTTTCG - 3'  |
| <i>IL-10</i>      | Forward | 5' - GCTCTTACTGACTGGCATGAG - 3'  |
|                   | Reverse | 5' - CGCAGCTCTAGGAGCATGTG - 3'   |
| <i>Arginase-1</i> | Forward | 5' - GAACACGGCAGTGGCTTTAAC - 3'  |
|                   | Reverse | 5' - TGCTTAGCTCTGTCTGCTTTGC - 3' |
| <i>IL-17A</i>     | Forward | 5' - AACACTGAGGCCAAGGACTT - 3'   |
|                   | Reverse | 5' - ACCCACCAGCATCTTCTCG - 3'    |
| <i>I-CAM</i>      | Forward | 5' - GGCTGGCATTGTTCTCTAA - 3'    |
|                   | Reverse | 5' - TTCAGAGGCAGGAAACAGG - 3'    |
| <i>V-CAM</i>      | Forward | 5' - CCCAAACAGAGGCAGAGTGT - 3'   |
|                   | Reverse | 5' - CAGGATTTTGGGAGCTGGTA - 3'   |
| <i>E-selectin</i> | Forward | 5' - AGCTACCCATGGAACACGAC - 3'   |
|                   | Reverse | 5' - CGCAAGTTCTCCAGCTGTT - 3'    |
| <i>P-selectin</i> | Forward | 5' - ATGCCTGGCTACTGGACACT - 3'   |
|                   | Reverse | 5' - CTTCATCGCACATGAACTGG - 3'   |
| <i>GAPDH</i>      | Forward | 5' - CCATTTGCAGTGGCAAAG - 3'     |
|                   | Reverse | 5' - CACCCCATTTGATGTTAGTG - 3'   |

**Supplementary Table 1.** Sequence of primers for real-time PCR.

Table 2. Statistical parameter in Figure 1.

**Passive avoidance test**

| Before surgery | control | surgery | surgery+nt-p65-TMD (5mg/kg) | surgery+nt-p65-TMD (10mg/kg) |
|----------------|---------|---------|-----------------------------|------------------------------|
| Minimum        | 6       | 4       | 5                           | 4                            |
| 25% Percentile | 7       | 8       | 7                           | 6                            |
| Median         | 10.5    | 11      | 10                          | 11                           |
| 75% Percentile | 15.75   | 21      | 11                          | 20                           |
| Maximum        | 38      | 23      | 21                          | 27                           |
| After surgery  | control | surgery | surgery+nt-p65-TMD (5mg/kg) | surgery+nt-p65-TMD (10mg/kg) |
| Minimum        | 74      | 13      | 12                          | 15                           |
| 25% Percentile | 127.5   | 28      | 29                          | 92                           |
| Median         | 262     | 78      | 128                         | 257                          |
| 75% Percentile | 300     | 123     | 204                         | 300                          |
| Maximum        | 300     | 251     | 300                         | 300                          |

**Elevated Plus Maze**

| Before surgery | control | surgery | surgery+nt-p65-TMD (5mg/kg) | surgery+nt-p65-TMD (10mg/kg) |
|----------------|---------|---------|-----------------------------|------------------------------|
| Minimum        | 15.45   | 10.95   | 9.72                        | 15.42                        |
| 25% Percentile | 19.5    | 16.25   | 15.45                       | 19.61                        |
| Median         | 24.32   | 20.48   | 22.35                       | 27.04                        |
| 75% Percentile | 31.57   | 26.9    | 25.87                       | 41.07                        |
| Maximum        | 41.05   | 41.31   | 46.13                       | 50.38                        |
| After surgery  | control | surgery | surgery+nt-p65-TMD (5mg/kg) | surgery+nt-p65-TMD (10mg/kg) |
| Minimum        | 2.55    | 7.68    | 4.38                        | 3.42                         |
| 25% Percentile | 4.05    | 14.3    | 5.765                       | 5.575                        |
| Median         | 7.78    | 17.72   | 10.92                       | 8.35                         |
| 75% Percentile | 9.085   | 32.22   | 14.13                       | 12.24                        |
| Maximum        | 17.98   | 46.26   | 16.85                       | 18.22                        |
| Learning index | control | surgery | surgery+nt-p65-TMD (5mg/kg) | surgery+nt-p65-TMD (10mg/kg) |
| Minimum        | 9       | -15.64  | -1.2                        | 7.87                         |
| 25% Percentile | 11.29   | -10.14  | 7.3                         | 13.62                        |
| Median         | 14.8    | -0.17   | 12.27                       | 18.75                        |
| 75% Percentile | 27.52   | 9.385   | 16.62                       | 26.19                        |
| Maximum        | 38.5    | 10.54   | 32.06                       | 46.96                        |

**Novel objective recognition test**

|                | control | surgery | surgery+nt-p65-TMD (5mg/kg) | surgery+nt-p65-TMD (10mg/kg) |
|----------------|---------|---------|-----------------------------|------------------------------|
| Minimum        | 54.62   | 36.97   | 40.71                       | 52.74                        |
| 25% Percentile | 61.5    | 38.51   | 47.6                        | 59.69                        |
| Median         | 72.5    | 49.87   | 53.8                        | 67.81                        |
| 75% Percentile | 78.07   | 55.24   | 68.27                       | 72.8                         |
| Maximum        | 81.51   | 58.9    | 71.06                       | 77.52                        |

**Electrophysiology**

|            | control | surgery | surgery+nt-p65-TMD (5mg/kg) | surgery+nt-p65-TMD (10mg/kg) |
|------------|---------|---------|-----------------------------|------------------------------|
| Mean       | 147.4   | 106.8   | 132.3                       | 141.7                        |
| Std. Error | 5.56    | 4.119   | 4.049                       | 3.743                        |

Supplementary Table 2. Statistical parameter in Figure 1.

Table 3. Statistical parameter in Figure 2.

**Evans Blue Extravasation**

| striatum & cortex | control | surgery | surgery+nt-p65-TMD (5mg/kg) | surgery+nt-p65-TMD (10mg/kg) |
|-------------------|---------|---------|-----------------------------|------------------------------|
| Mean              | 6.326   | 16.37   | 10.26                       | 9.089                        |
| Std. Error        | 1.484   | 3.135   | 0.739                       | 1.515                        |
| Hippocampus       | control | surgery | surgery+nt-p65-TMD (5mg/kg) | surgery+nt-p65-TMD (10mg/kg) |
| Mean              | 9.245   | 16.52   | 13.25                       | 8.029                        |
| Std. Error        | 0.5631  | 0.7432  | 0.3868                      | 1.515                        |

**MPO expression (IF)**

| CA1        | control | surgery | surgery+nt-p65-TMD (5mg/kg) | surgery+nt-p65-TMD (10mg/kg) |
|------------|---------|---------|-----------------------------|------------------------------|
| Mean       | 12.65   | 33.79   | 15.91                       | 14.92                        |
| Std. Error | 0.3499  | 3.247   | 0.5455                      | 1.575                        |
| CA3        | control | surgery | surgery+nt-p65-TMD (5mg/kg) | surgery+nt-p65-TMD (10mg/kg) |
| Mean       | 14.05   | 35.7    | 16.31                       | 15.64                        |
| Std. Error | 1.002   | 3.052   | 0.3507                      | 2.377                        |
| DG         | control | surgery | surgery+nt-p65-TMD (5mg/kg) | surgery+nt-p65-TMD (10mg/kg) |
| Mean       | 16.42   | 45.89   | 11.94                       | 16.02                        |
| Std. Error | 1.417   | 1.574   | 0.9182                      | 1.318                        |

**Real-time PCR**

| ICAM-1     | control | surgery | surgery+nt-p65-TMD (5mg/kg) | surgery+nt-p65-TMD (10mg/kg) |
|------------|---------|---------|-----------------------------|------------------------------|
| Mean       | 0.937   | 4.725   | 1.162                       | 1.349                        |
| Std. Error | 0.03901 | 2.102   | 0.1675                      | 0.09472                      |
| VCAM-1     | control | surgery | surgery+nt-p65-TMD (5mg/kg) | surgery+nt-p65-TMD (10mg/kg) |
| Mean       | 0.8401  | 1.402   | 1.075                       | 0.9462                       |
| Std. Error | 0.07853 | 0.1575  | 0.08977                     | 0.0839                       |
| E-selectin | control | surgery | surgery+nt-p65-TMD (5mg/kg) | surgery+nt-p65-TMD (10mg/kg) |
| Mean       | 0.9737  | 1.774   | 1.258                       | 1.079                        |
| Std. Error | 0.07927 | 0.1958  | 0.1907                      | 0.1915                       |
| P-selectin | control | surgery | surgery+nt-p65-TMD (5mg/kg) | surgery+nt-p65-TMD (10mg/kg) |
| Mean       | 0.8337  | 8.417   | 0.8303                      | 1.4                          |
| Std. Error | 0.03283 | 4.36    | 0.07995                     | 0.277                        |

**Supplementary Table 3.** Statistical parameter in Figure 2.



Table 4. Statistical parameter in Figure 3.

**ELISA assay (Hippocampus)**

|               | control  | surgery  | surgery+nt-p65-TMD (5mg/kg) | surgery+nt-p65-TMD (10mg/kg) |
|---------------|----------|----------|-----------------------------|------------------------------|
| IL-1 $\beta$  |          |          |                             |                              |
| Mean          | 45660000 | 68640000 | 35320000                    | 39270000                     |
| Std. Error    | 318756   | 5122000  | 2819000                     | 1725000                      |
| IL-6          |          |          |                             |                              |
| Mean          | 6922000  | 37120000 | 16650000                    | 12630000                     |
| Std. Error    | 367577   | 11870000 | 2183000                     | 1165000                      |
| TNF- $\alpha$ |          |          |                             |                              |
| Mean          | 30630000 | 52710000 | 32890000                    | 38020000                     |
| Std. Error    | 3252000  | 3208000  | 4909000                     | 3779000                      |
| MCP-1         |          |          |                             |                              |
| Mean          | 27130000 | 39740000 | 28070000                    | 30610000                     |
| Std. Error    | 3976000  | 1083000  | 2132000                     | 1699000                      |

**ELISA assay (Spleen)**

|               | control | surgery  | surgery+nt-p65-TMD (5mg/kg) | surgery+nt-p65-TMD (10mg/kg) |
|---------------|---------|----------|-----------------------------|------------------------------|
| IL-1 $\beta$  |         |          |                             |                              |
| Mean          | 77180   | 122641   | 63524                       | 65625                        |
| Std. Error    | 4408    | 13618    | 2822                        | 5785                         |
| IL-6          |         |          |                             |                              |
| Mean          | 2642000 | 3988000  | 1653000                     | 2059000                      |
| Std. Error    | 245834  | 278022   | 450682                      | 454569                       |
| TNF- $\alpha$ |         |          |                             |                              |
| Mean          | 5117000 | 26320000 | 8349000                     | 5873000                      |
| Std. Error    | 1235000 | 6588000  | 2133000                     | 1003000                      |

**Spleen weight (mg)**

|            | control | surgery | surgery+nt-p65-TMD (5mg/kg) | surgery+nt-p65-TMD (10mg/kg) |
|------------|---------|---------|-----------------------------|------------------------------|
| Mean       | 139.3   | 96.92   | 113.6                       | 133.1                        |
| Std. Error | 8.016   | 8.577   | 8.972                       | 14.34                        |

**Spleen size (mm)**

|            | control | surgery | surgery+nt-p65-TMD (5mg/kg) | surgery+nt-p65-TMD (10mg/kg) |
|------------|---------|---------|-----------------------------|------------------------------|
| Mean       | 21.2    | 17.85   | 18.36                       | 19.62                        |
| Std. Error | 0.2795  | 0.4058  | 0.6364                      | 0.8737                       |

**Supplementary Table 4.** Statistical parameter in Figure 3

Table 5. Statistical parameter in Figure 4.

**Real-time PCR (Hippocampus)**

| IL-1 $\beta$  | control | surgery | surgery+nt-p65-TMD (10mg/kg) |
|---------------|---------|---------|------------------------------|
| Mean          | 0.6908  | 1.183   | 0.6126                       |
| Std. Error    | 0.07517 | 0.1521  | 0.09014                      |
| IL-6          | control | surgery | surgery+nt-p65-TMD (10mg/kg) |
| Mean          | 0.7525  | 1.307   | 0.6104                       |
| Std. Error    | 0.09554 | 0.1614  | 0.0244                       |
| TNF- $\alpha$ | control | surgery | surgery+nt-p65-TMD (10mg/kg) |
| Mean          | 0.6331  | 2.605   | 0.6194                       |
| Std. Error    | 0.1223  | 1.115   | 0.1132                       |
| arginase-1    | control | surgery | surgery+nt-p65-TMD (10mg/kg) |
| Mean          | 7.647   | 8.223   | 8.037                        |
| Std. Error    | 0.1719  | 0.2414  | 0.4386                       |
| IL-10         | control | surgery | surgery+nt-p65-TMD (10mg/kg) |
| Mean          | 8.379   | 8.955   | 8.515                        |
| Std. Error    | 0.2117  | 0.2894  | 0.4621                       |

**Real-time PCR (Spleen)**

| IL-1 $\beta$  | control | surgery | surgery+nt-p65-TMD (10mg/kg) |
|---------------|---------|---------|------------------------------|
| Mean          | 0.7312  | 3.823   | 0.9957                       |
| Std. Error    | 0.1133  | 0.5327  | 0.103                        |
| IL-6          | control | surgery | surgery+nt-p65-TMD (10mg/kg) |
| Mean          | 0.7372  | 1.277   | 0.8521                       |
| Std. Error    | 0.03471 | 0.04705 | 0.05917                      |
| TNF- $\alpha$ | control | surgery | surgery+nt-p65-TMD (10mg/kg) |
| Mean          | 0.5838  | 2.036   | 0.461                        |
| Std. Error    | 0.09839 | 0.3099  | 0.1137                       |
| arginase-1    | control | surgery | surgery+nt-p65-TMD (10mg/kg) |
| Mean          | 1.128   | 0.9996  | 1.186                        |
| Std. Error    | 0.3234  | 0.1377  | 0.4583                       |
| IL-10         | control | surgery | surgery+nt-p65-TMD (10mg/kg) |
| Mean          | 2.059   | 0.5546  | 2.122                        |
| Std. Error    | 0.5482  | 0.157   | 0.4774                       |

**Supplementary Table 5.** Statistical parameter in Figure 4.

Table 6. Statistical parameter in Figure 5.

**Passive avoidance test**

| Before LPS     | control | LPS   | LPS+nt-p65-TMD (5mg/kg) |
|----------------|---------|-------|-------------------------|
| Minimum        | 3       | 7     | 8                       |
| 25% Percentile | 5.25    | 7.5   | 9.5                     |
| Median         | 8.5     | 9     | 17                      |
| 75% Percentile | 12.75   | 20.5  | 21                      |
| Maximum        | 15      | 25    | 23                      |
| After LPS      | control | LPS   | LPS+nt-p65-TMD (5mg/kg) |
| Minimum        | 125     | 16    | 67                      |
| 25% Percentile | 194.5   | 47    | 81                      |
| Median         | 281.5   | 95    | 182                     |
| 75% Percentile | 300     | 210.5 | 300                     |
| Maximum        | 300     | 300   | 300                     |

**Elevated Plus Maze**

| Before LPS     | control | LPS    | LPS+nt-p65-TMD (5mg/kg) |
|----------------|---------|--------|-------------------------|
| Minimum        | 18.88   | 6.32   | 17.55                   |
| 25% Percentile | 24.86   | 12.18  | 18.95                   |
| Median         | 28.5    | 18.78  | 33.25                   |
| 75% Percentile | 33.93   | 25.78  | 47.32                   |
| Maximum        | 41.05   | 33.38  | 55.18                   |
| After LPS      | control | LPS    | LPS+nt-p65-TMD (5mg/kg) |
| Minimum        | 2.55    | 12.75  | 2.18                    |
| 25% Percentile | 4.328   | 13.08  | 4.08                    |
| Median         | 5.77    | 29.98  | 9.45                    |
| 75% Percentile | 7.858   | 52.02  | 12.35                   |
| Maximum        | 9.68    | 177.2  | 23.55                   |
| Learning index | control | LPS    | LPS+nt-p65-TMD (5mg/kg) |
| Minimum        | 9.2     | -156.4 | 7.7                     |
| 25% Percentile | 18.32   | -43.76 | 10.7                    |
| Median         | 21.85   | -1.77  | 23.8                    |
| 75% Percentile | 28.4    | 3.37   | 31.63                   |
| Maximum        | 28.4    | 3.4    | 45.14                   |

**Novel objective recognition test**

|                | control | LPS   | LPS+nt-p65-TMD (5mg/kg) |
|----------------|---------|-------|-------------------------|
| Minimum        | 42.22   | 20.41 | 35.32                   |
| 25% Percentile | 47.69   | 25.63 | 36.54                   |
| Median         | 53.23   | 37.89 | 51.62                   |
| 75% Percentile | 66.25   | 48.7  | 59.06                   |
| Maximum        | 73.53   | 49.93 | 68.88                   |

**Electrophysiology**

|            | control | LPS   | LPS+nt-p65-TMD (5mg/kg) |
|------------|---------|-------|-------------------------|
| Mean       | 49.47   | 11.24 | 39.68                   |
| Std. Error | 3.315   | 2.691 | 2.039                   |

Table 6. Statistical parameter in Figure 5.

**ELISA assay (Hippocampus)**

| IL-1 $\beta$ | control | LPS   | LPS+nt-p65-TMD (5mg/kg) |
|--------------|---------|-------|-------------------------|
| Mean         | 11.5    | 63.93 | 37.8                    |
| Std. Error   | 5.796   | 2.937 | 4.885                   |
| IL-6         | control | LPS   | LPS+nt-p65-TMD (5mg/kg) |
| Mean         | 7.611   | 18.64 | 8.469                   |
| Std. Error   | 1.855   | 1.673 | 2.057                   |

**ELISA assay (Spleen)**

| IL-1 $\beta$ | control | LPS   | LPS+nt-p65-TMD (5mg/kg) |
|--------------|---------|-------|-------------------------|
| Mean         | 0.4045  | 30.06 | 27.65                   |
| Std. Error   | 0.1041  | 1.762 | 2.243                   |
| IL-6         | control | LPS   | LPS+nt-p65-TMD (5mg/kg) |
| Mean         | 29.12   | 125.2 | 61.95                   |
| Std. Error   | 0.9818  | 35.49 | 11.84                   |

**Real-time PCR (Hippocampus)**

| IL-1 $\beta$  | control | LPS    | LPS+nt-p65-TMD (5mg/kg) |
|---------------|---------|--------|-------------------------|
| Mean          | 1.097   | 16.26  | 1.132                   |
| Std. Error    | 0.122   | 6.81   | 0.1322                  |
| IL-6          | control | LPS    | LPS+nt-p65-TMD (5mg/kg) |
| Mean          | 0.9371  | 5.599  | 0.5839                  |
| Std. Error    | 0.04727 | 2.231  | 0.04991                 |
| TNF- $\alpha$ | control | LPS    | LPS+nt-p65-TMD (5mg/kg) |
| Mean          | 0.8365  | 86.32  | 5.345                   |
| Std. Error    | 0.09438 | 45.28  | 0.8527                  |
| IL-10         | control | LPS    | LPS+nt-p65-TMD (5mg/kg) |
| Mean          | 1.16    | 1.437  | 1.324                   |
| Std. Error    | 0.112   | 0.3374 | 0.1389                  |

**Real-time PCR (Spleen)**

| IL-1 $\beta$  | control | LPS     | LPS+nt-p65-TMD (5mg/kg) |
|---------------|---------|---------|-------------------------|
| Mean          | 0.5141  | 1.708   | 0.1277                  |
| Std. Error    | 0.05109 | 0.4854  | 0.02167                 |
| IL-6          | control | LPS     | LPS+nt-p65-TMD (5mg/kg) |
| Mean          | 0.6111  | 1.218   | 0.1128                  |
| Std. Error    | 0.1229  | 0.2136  | 0.01992                 |
| TNF- $\alpha$ | control | LPS     | LPS+nt-p65-TMD (5mg/kg) |
| Mean          | 0.5072  | 2.883   | 0.2632                  |
| Std. Error    | 0.119   | 1.185   | 0.06191                 |
| IL-10         | control | LPS     | LPS+nt-p65-TMD (5mg/kg) |
| Mean          | 1.339   | 0.8091  | 3.307                   |
| Std. Error    | 0.3379  | 0.05862 | 1.001                   |

**Supplementary Table 6.** Statistical parameter in Figure 5

Table 7. Statistical parameter in Figure 6.

**ELISA assay (BV2 cell line)**

| IL-1 $\beta$  | control | LPS   | LPS+nt-p65-TMD (500nM) | LPS+nt-p65-TMD (1 $\mu$ M) |
|---------------|---------|-------|------------------------|----------------------------|
| Mean          | 0.5294  | 21.21 | 14.64                  | 11.25                      |
| Std. Error    | 0.4647  | 1.375 | 3.239                  | 1.066                      |
| IL-6          | control | LPS   | LPS+nt-p65-TMD (500nM) | LPS+nt-p65-TMD (1 $\mu$ M) |
| Mean          | 576.7   | 11064 | 10961                  | 9752                       |
| Std. Error    | 26.09   | 362.9 | 235.6                  | 283.4                      |
| TNF- $\alpha$ | control | LPS   | LPS+nt-p65-TMD (500nM) | LPS+nt-p65-TMD (1 $\mu$ M) |
| Mean          | 247.5   | 960.2 | 792.2                  | 671.9                      |
| Std. Error    | 8.566   | 19.57 | 18.59                  | 33.65                      |

**Real-time PCR (BV2 cell line)**

| IL-1 $\beta$  | control | LPS     | LPS+nt-p65-TMD (500nM) | LPS+nt-p65-TMD (1 $\mu$ M) |
|---------------|---------|---------|------------------------|----------------------------|
| Mean          | 0.8055  | 2.151   | 1.426                  | 0.2537                     |
| Std. Error    | 0.06905 | 0.2131  | 0.1847                 | 0.07577                    |
| IL-6          | control | LPS     | LPS+nt-p65-TMD (500nM) | LPS+nt-p65-TMD (1 $\mu$ M) |
| Mean          | 0.97    | 5.381   | 4.449                  | 3.492                      |
| Std. Error    | 0.1312  | 0.4023  | 1.109                  | 0.9553                     |
| TNF- $\alpha$ | control | LPS     | LPS+nt-p65-TMD (500nM) | LPS+nt-p65-TMD (1 $\mu$ M) |
| Mean          | 1.183   | 3.075   | 2.35                   | 2.164                      |
| Std. Error    | 0.1719  | 0.08774 | 0.2702                 | 0.2601                     |
| CXCL10        | control | LPS     | LPS+nt-p65-TMD (500nM) | LPS+nt-p65-TMD (1 $\mu$ M) |
| Mean          | 0.9371  | 4.958   | 3.473                  | 2.809                      |
| Std. Error    | 0.1264  | 0.4874  | 0.5617                 | 0.5822                     |
| iNOS          | control | LPS     | LPS+nt-p65-TMD (500nM) | LPS+nt-p65-TMD (1 $\mu$ M) |
| Mean          | 1.014   | 2.689   | 1.948                  | 1.348                      |
| Std. Error    | 0.03082 | 0.1258  | 0.1136                 | 0.244                      |
| arginase-1    | control | LPS     | LPS+nt-p65-TMD (500nM) | LPS+nt-p65-TMD (1 $\mu$ M) |
| Mean          | 1.081   | 0.7841  | 0.8235                 | 0.8576                     |
| Std. Error    | 0.1118  | 0.142   | 0.06377                | 0.1177                     |
| IL-10         | control | LPS     | LPS+nt-p65-TMD (500nM) | LPS+nt-p65-TMD (1 $\mu$ M) |
| Mean          | 1.053   | 0.7651  | 0.8733                 | 0.8004                     |
| Std. Error    | 0.09778 | 0.06243 | 0.06142                | 0.06796                    |

Table 7. Statistical parameter in Figure 6.

**ELISA assay (RAW264.7 cell line)**

| IL-1 $\beta$  | control | LPS   | LPS+nt-p65-TMD (500nM) | LPS+nt-p65-TMD (1 $\mu$ M) |
|---------------|---------|-------|------------------------|----------------------------|
| Mean          | 4.027   | 651.8 | 513.3                  | 451.5                      |
| Std. Error    | 1.26    | 19.05 | 29.09                  | 31.87                      |
| IL-6          | control | LPS   | LPS+nt-p65-TMD (500nM) | LPS+nt-p65-TMD (1 $\mu$ M) |
| Mean          | -38.69  | 15064 | 12728                  | 12926                      |
| Std. Error    | 3.248   | 779.1 | 156.6                  | 128.1                      |
| TNF- $\alpha$ | control | LPS   | LPS+nt-p65-TMD (500nM) | LPS+nt-p65-TMD (1 $\mu$ M) |
| Mean          | 79.42   | 1486  | 1405                   | 1386                       |
| Std. Error    | 2.786   | 26.53 | 8.123                  | 6.732                      |

**Real-time PCR (RAW264.7 cell line)**

| IL-1 $\beta$  | control | LPS    | LPS+nt-p65-TMD (500nM) | LPS+nt-p65-TMD (1 $\mu$ M) |
|---------------|---------|--------|------------------------|----------------------------|
| Mean          | 1.82    | 390.2  | 276.2                  | 76.42                      |
| Std. Error    | 0.2967  | 51.22  | 51.29                  | 21.14                      |
| IL-6          | control | LPS    | LPS+nt-p65-TMD (500nM) | LPS+nt-p65-TMD (1 $\mu$ M) |
| Mean          | 5.839   | 468.1  | 293.1                  | 246.1                      |
| Std. Error    | 1.977   | 92.41  | 23.38                  | 38.93                      |
| TNF- $\alpha$ | control | LPS    | LPS+nt-p65-TMD (500nM) | LPS+nt-p65-TMD (1 $\mu$ M) |
| Mean          | 1.069   | 9.166  | 8.922                  | 3.847                      |
| Std. Error    | 0.03002 | 0.2636 | 0.7214                 | 0.2385                     |
| CXCL10        | control | LPS    | LPS+nt-p65-TMD (500nM) | LPS+nt-p65-TMD (1 $\mu$ M) |
| Mean          | 1.129   | 6.429  | 3.065                  | 2.576                      |
| Std. Error    | 0.07734 | 0.612  | 0.2363                 | 0.3062                     |
| iNOS          | control | LPS    | LPS+nt-p65-TMD (500nM) | LPS+nt-p65-TMD (1 $\mu$ M) |
| Mean          | 1.49    | 3563   | 3521                   | 1732                       |
| Std. Error    | 0.1949  | 704.9  | 859.7                  | 466.1                      |
| arginase-1    | control | LPS    | LPS+nt-p65-TMD (500nM) | LPS+nt-p65-TMD (1 $\mu$ M) |
| Mean          | 2.06    | 3.769  | 5.093                  | 10.05                      |
| Std. Error    | 1.003   | 1.475  | 3.067                  | 3.821                      |
| IL-10         | control | LPS    | LPS+nt-p65-TMD (500nM) | LPS+nt-p65-TMD (1 $\mu$ M) |
| Mean          | 4.212   | 2.595  | 7.324                  | 14.01                      |
| Std. Error    | 2.036   | 0.9585 | 2.907                  | 3.352                      |

**Supplementary Table 7.** Statistical parameter in Figure 6

Table 8. Statistical parameter in Supplementary Figure 1.

**NE expression (IF)**

| cortex     | control | surgery | surgery+nt-p65-TMD (5mg/kg) | surgery+nt-p65-TMD (10mg/kg) |
|------------|---------|---------|-----------------------------|------------------------------|
| Mean       | 5.907   | 11.27   | 5.739                       | 4.841                        |
| Std. Error | 0.7683  | 0.8799  | 0.7526                      | 0.4231                       |

**Western blot analysis**

| NE         | control | surgery | surgery+nt-p65-TMD (5mg/kg) | surgery+nt-p65-TMD (10mg/kg) |
|------------|---------|---------|-----------------------------|------------------------------|
| Mean       | 1       | 1.232   | 0.9833                      | 0.8481                       |
| Std. Error | 0       | 0.0467  | 0.07534                     | 0.05981                      |
| Iba-1      | control | surgery | surgery+nt-p65-TMD (5mg/kg) | surgery+nt-p65-TMD (10mg/kg) |
| Mean       | 1       | 1.206   | 0.8503                      | 0.7656                       |
| Std. Error | 0       | 0.02665 | 0.03109                     | 0.04918                      |
| CE11b      | control | surgery | surgery+nt-p65-TMD (5mg/kg) | surgery+nt-p65-TMD (10mg/kg) |
| Mean       | 1       | 1.621   | 0.7414                      | 0.8491                       |
| Std. Error | 0       | 0.1656  | 0.03355                     | 0.0687                       |

**Iba-1 expression**

| CA1        | control | surgery | surgery+nt-p65-TMD (5mg/kg) | surgery+nt-p65-TMD (10mg/kg) |
|------------|---------|---------|-----------------------------|------------------------------|
| Mean       | 16.45   | 24.15   | 20.39                       | 18.1                         |
| Std. Error | 1.054   | 0.6188  | 1.309                       | 1.757                        |
| CA3        | control | surgery | surgery+nt-p65-TMD (5mg/kg) | surgery+nt-p65-TMD (10mg/kg) |
| Mean       | 13.48   | 24.31   | 15.57                       | 15.5                         |
| Std. Error | 0.8548  | 2.462   | 1.646                       | 0.4631                       |
| DG         | control | surgery | surgery+nt-p65-TMD (5mg/kg) | surgery+nt-p65-TMD (10mg/kg) |
| Mean       | 15.76   | 23.98   | 19.13                       | 18.63                        |
| Std. Error | 0.8272  | 1.606   | 0.4642                      | 1.115                        |



Table 8. Statistical parameter in Supplementary Figure 1.

**VCAM-1 expression**

| CA1        | control | surgery | surgery+nt-p65-TMD (5mg/kg) | surgery+nt-p65-TMD (10mg/kg) |
|------------|---------|---------|-----------------------------|------------------------------|
| Mean       | 15.81   | 26.01   | 16.94                       | 15.9                         |
| Std. Error | 0.0951  | 2.591   | 0.6943                      | 0.6395                       |
| CA3        | control | surgery | surgery+nt-p65-TMD (5mg/kg) | surgery+nt-p65-TMD (10mg/kg) |
| Mean       | 12.44   | 25.54   | 14.54                       | 14.21                        |
| Std. Error | 0.1989  | 3.785   | 0.1321                      | 0.6782                       |
| DG         | control | surgery | surgery+nt-p65-TMD (5mg/kg) | surgery+nt-p65-TMD (10mg/kg) |
| Mean       | 17.94   | 26.19   | 16.77                       | 15                           |
| Std. Error | 1.307   | 1.143   | 1.444                       | 0.3221                       |

**ICAM-1 expression**

| CA1        | control | surgery | surgery+nt-p65-TMD (5mg/kg) | surgery+nt-p65-TMD (10mg/kg) |
|------------|---------|---------|-----------------------------|------------------------------|
| Mean       | 30.21   | 44.65   | 32.35                       | 35.89                        |
| Std. Error | 0.4393  | 0.9887  | 0.7637                      | 0.959                        |
| CA3        | control | surgery | surgery+nt-p65-TMD (5mg/kg) | surgery+nt-p65-TMD (10mg/kg) |
| Mean       | 37.18   | 54.2    | 43.63                       | 42.71                        |
| Std. Error | 4.441   | 1.865   | 1.777                       | 2.077                        |
| DG         | control | surgery | surgery+nt-p65-TMD (5mg/kg) | surgery+nt-p65-TMD (10mg/kg) |
| Mean       | 35.46   | 50.65   | 43.5                        | 42.56                        |
| Std. Error | 2.125   | 0.8208  | 1.054                       | 2.172                        |

**P-selectin expression**

| CA1        | control | surgery | surgery+nt-p65-TMD (5mg/kg) | surgery+nt-p65-TMD (10mg/kg) |
|------------|---------|---------|-----------------------------|------------------------------|
| Mean       | 17.72   | 29.79   | 22.4                        | 18.01                        |
| Std. Error | 0.2876  | 3.457   | 1.367                       | 1.251                        |
| CA3        | control | surgery | surgery+nt-p65-TMD (5mg/kg) | surgery+nt-p65-TMD (10mg/kg) |
| Mean       | 13.16   | 24.04   | 22.33                       | 15.99                        |
| Std. Error | 0.3999  | 1.705   | 1.574                       | 0.6261                       |
| DG         | control | surgery | surgery+nt-p65-TMD (5mg/kg) | surgery+nt-p65-TMD (10mg/kg) |
| Mean       | 18.52   | 29.98   | 22.02                       | 15.4                         |
| Std. Error | 0.2074  | 1.775   | 1.59                        | 0.6152                       |

**E-selectin expression**

| CA1        | control | surgery | surgery+nt-p65-TMD (5mg/kg) | surgery+nt-p65-TMD (10mg/kg) |
|------------|---------|---------|-----------------------------|------------------------------|
| Mean       | 18.21   | 31.34   | 25.49                       | 19.27                        |
| Std. Error | 3.058   | 1.57    | 2.01                        | 2.351                        |
| CA3        | control | surgery | surgery+nt-p65-TMD (5mg/kg) | surgery+nt-p65-TMD (10mg/kg) |
| Mean       | 21.47   | 44.88   | 25.5                        | 24.48                        |
| Std. Error | 0.3607  | 5.289   | 2.383                       | 2.591                        |
| DG         | control | surgery | surgery+nt-p65-TMD (5mg/kg) | surgery+nt-p65-TMD (10mg/kg) |
| Mean       | 16.37   | 31.5    | 27.4                        | 24.38                        |
| Std. Error | 2.659   | 1.18    | 3.582                       | 2.707                        |

**Supplementary Table 8.** Statistical parameter in Supplementary Figure 1.
